# Supplementary material for: Nutritional Intake after Liver Transplant: Systematic Review and Meta-Analysis
Source: MDPI journal article supplement (doi:10.3390/nu15112487), 2023-05-26
Supplement: s1 [file s1]

## Supplementary Figures

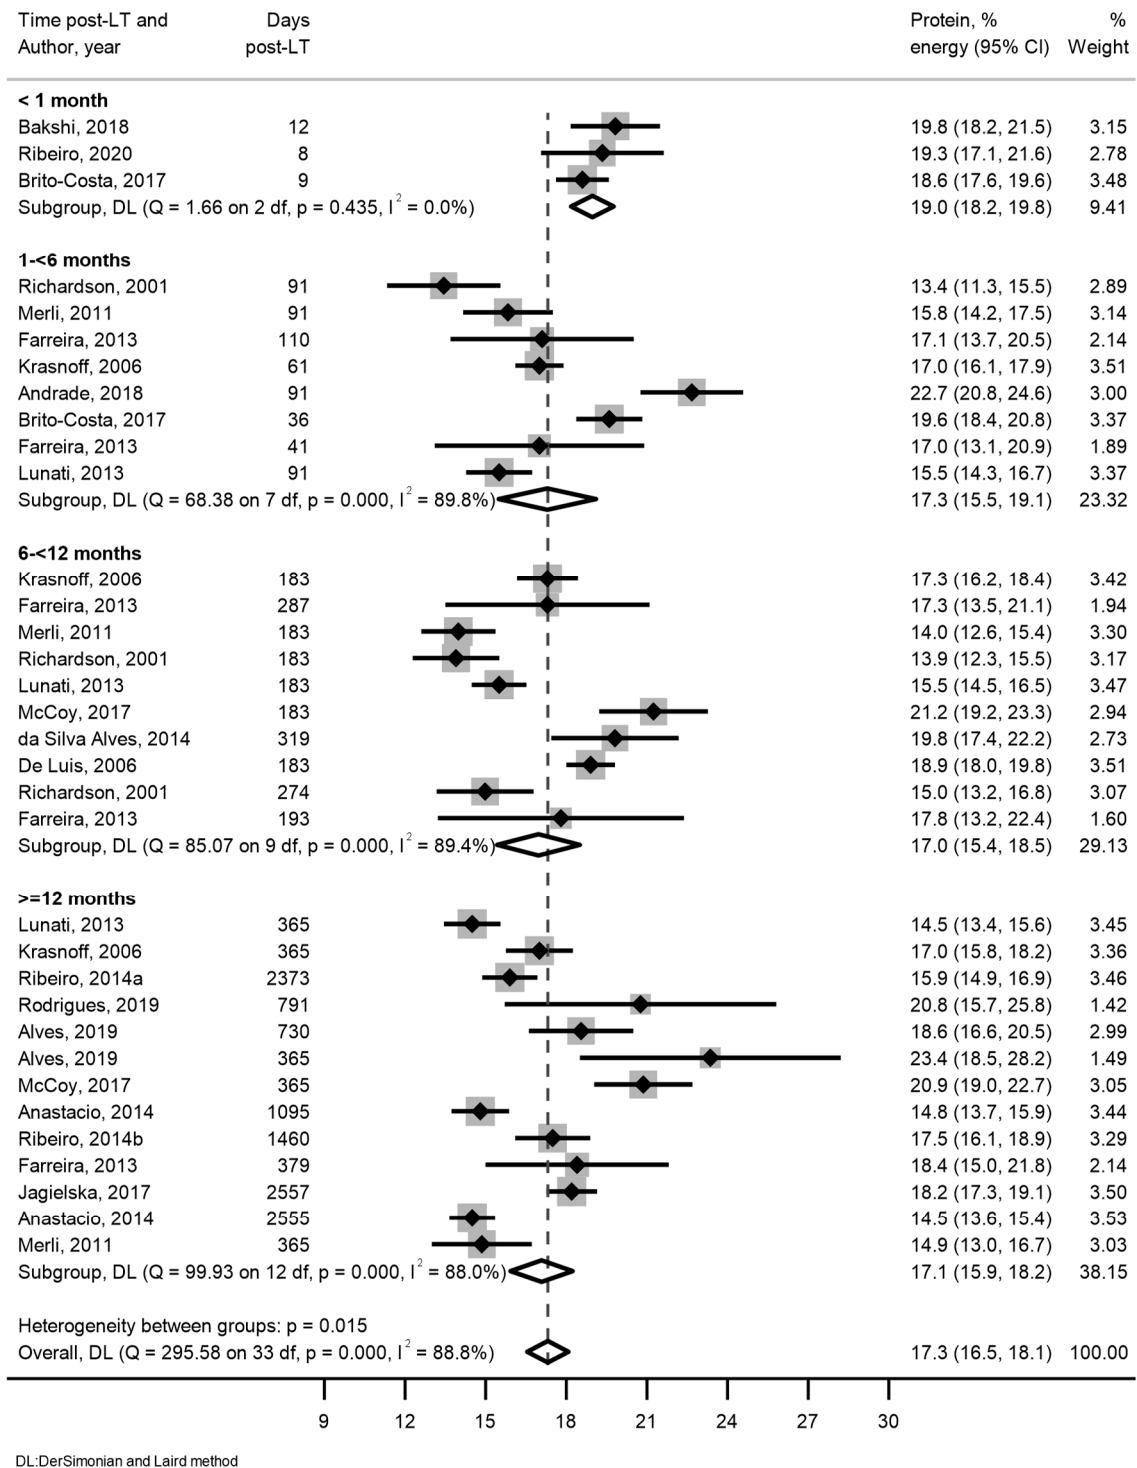

**Figure S1:** Mean daily protein intake (percent energy) with 95% confidence intervals from included studies categorised by time post-transplant.

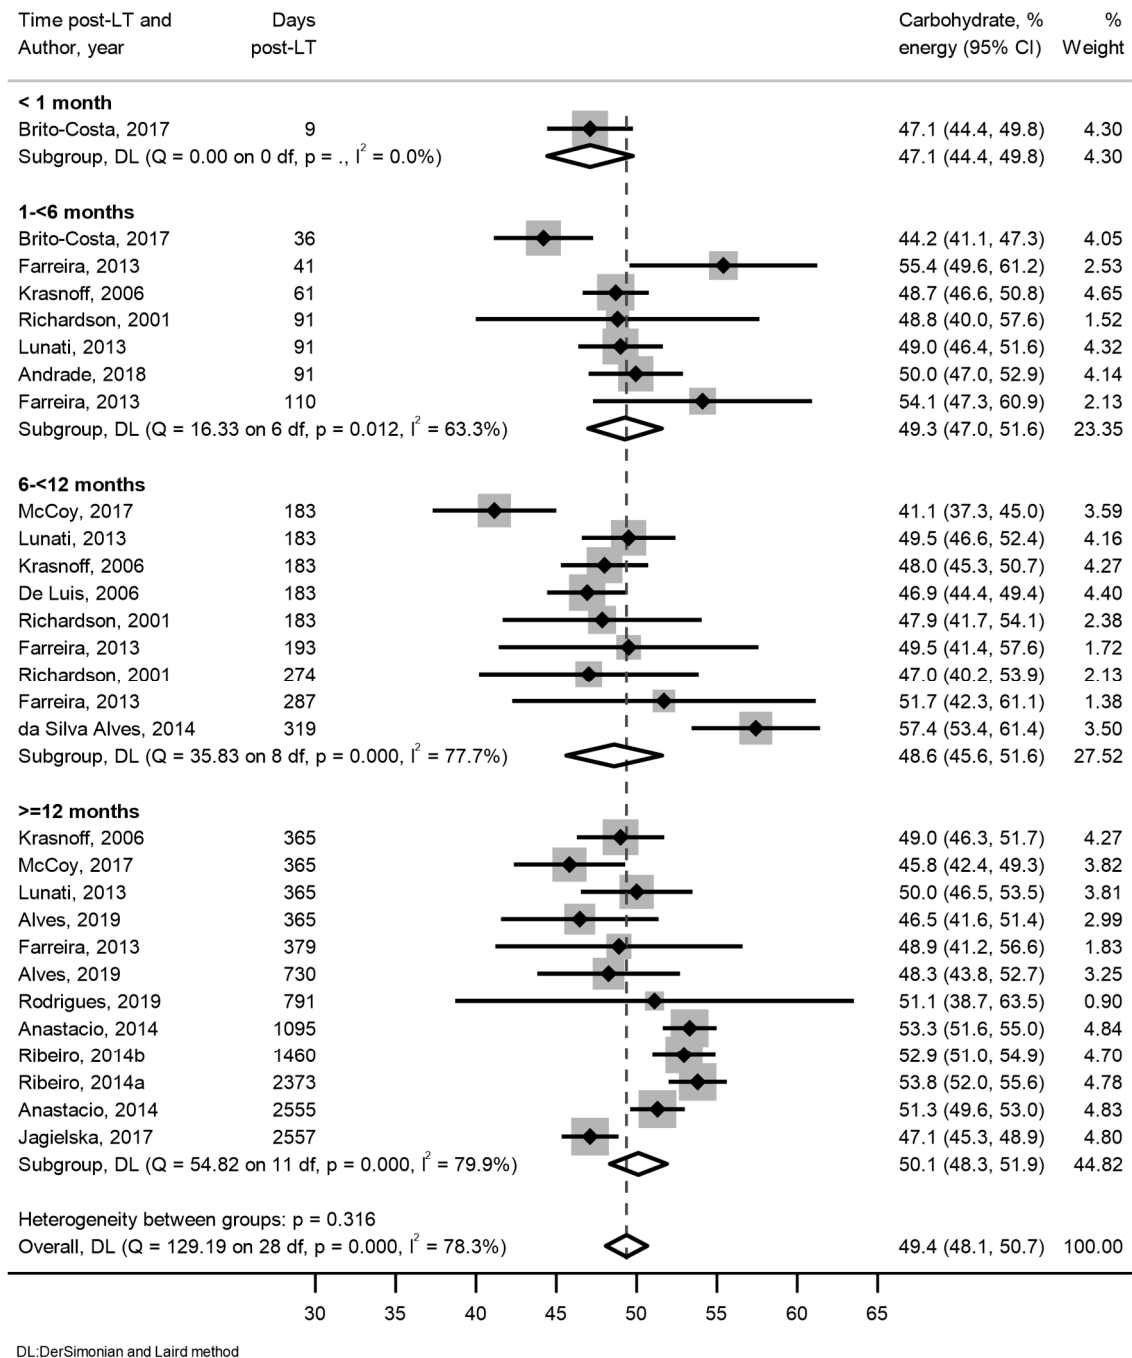

**Figure S2.** Mean daily carbohydrate intake (percent energy) with 95% confidence intervals from included studies categorised by time post-transplant.

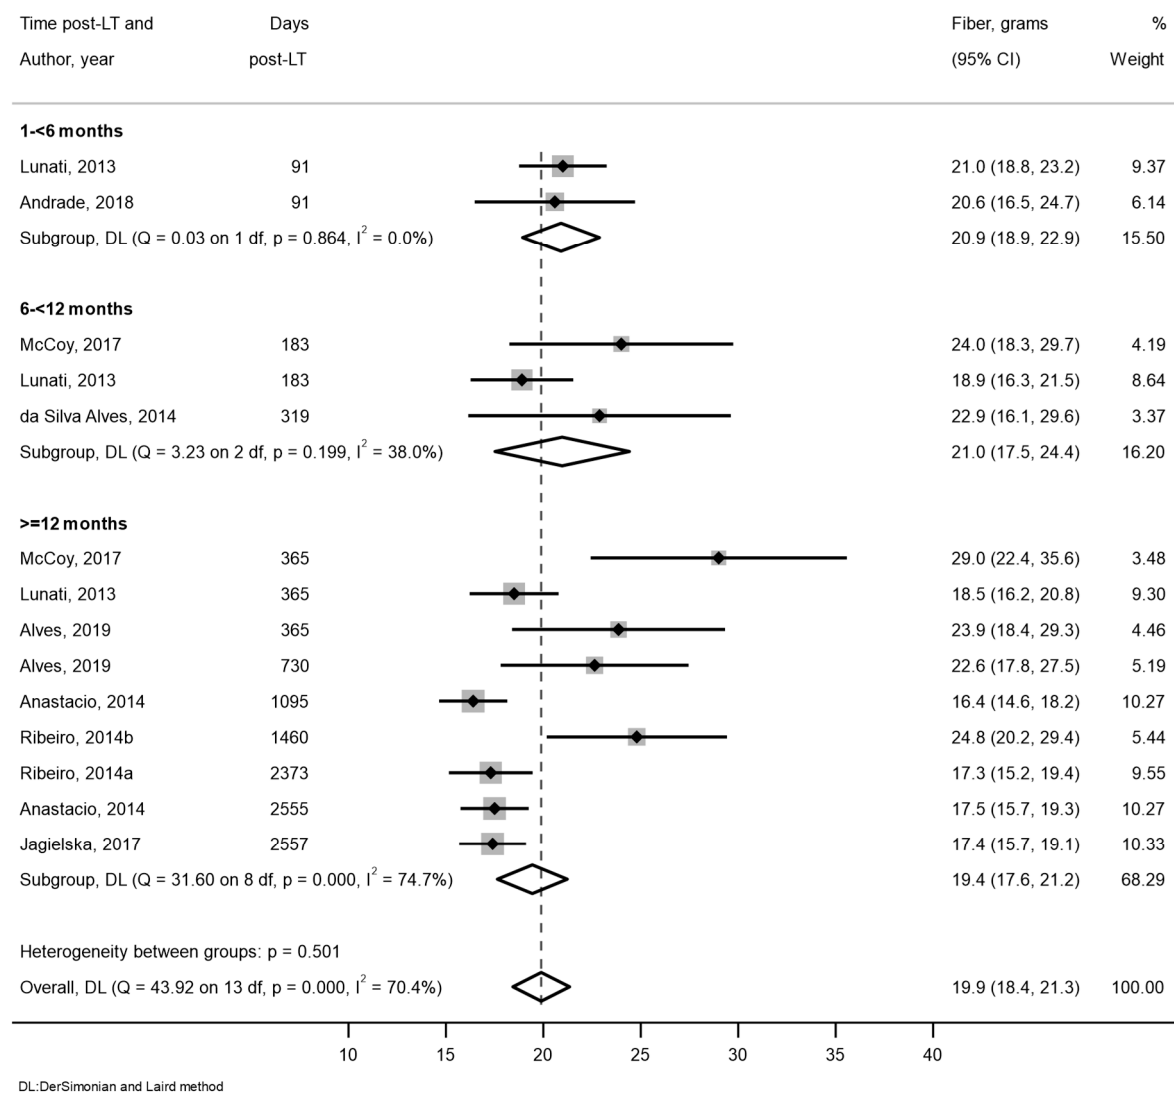

**Figure S3.** Mean daily fiber intake (grams) with 95% confidence intervals from included studies categorised by time post-transplant.

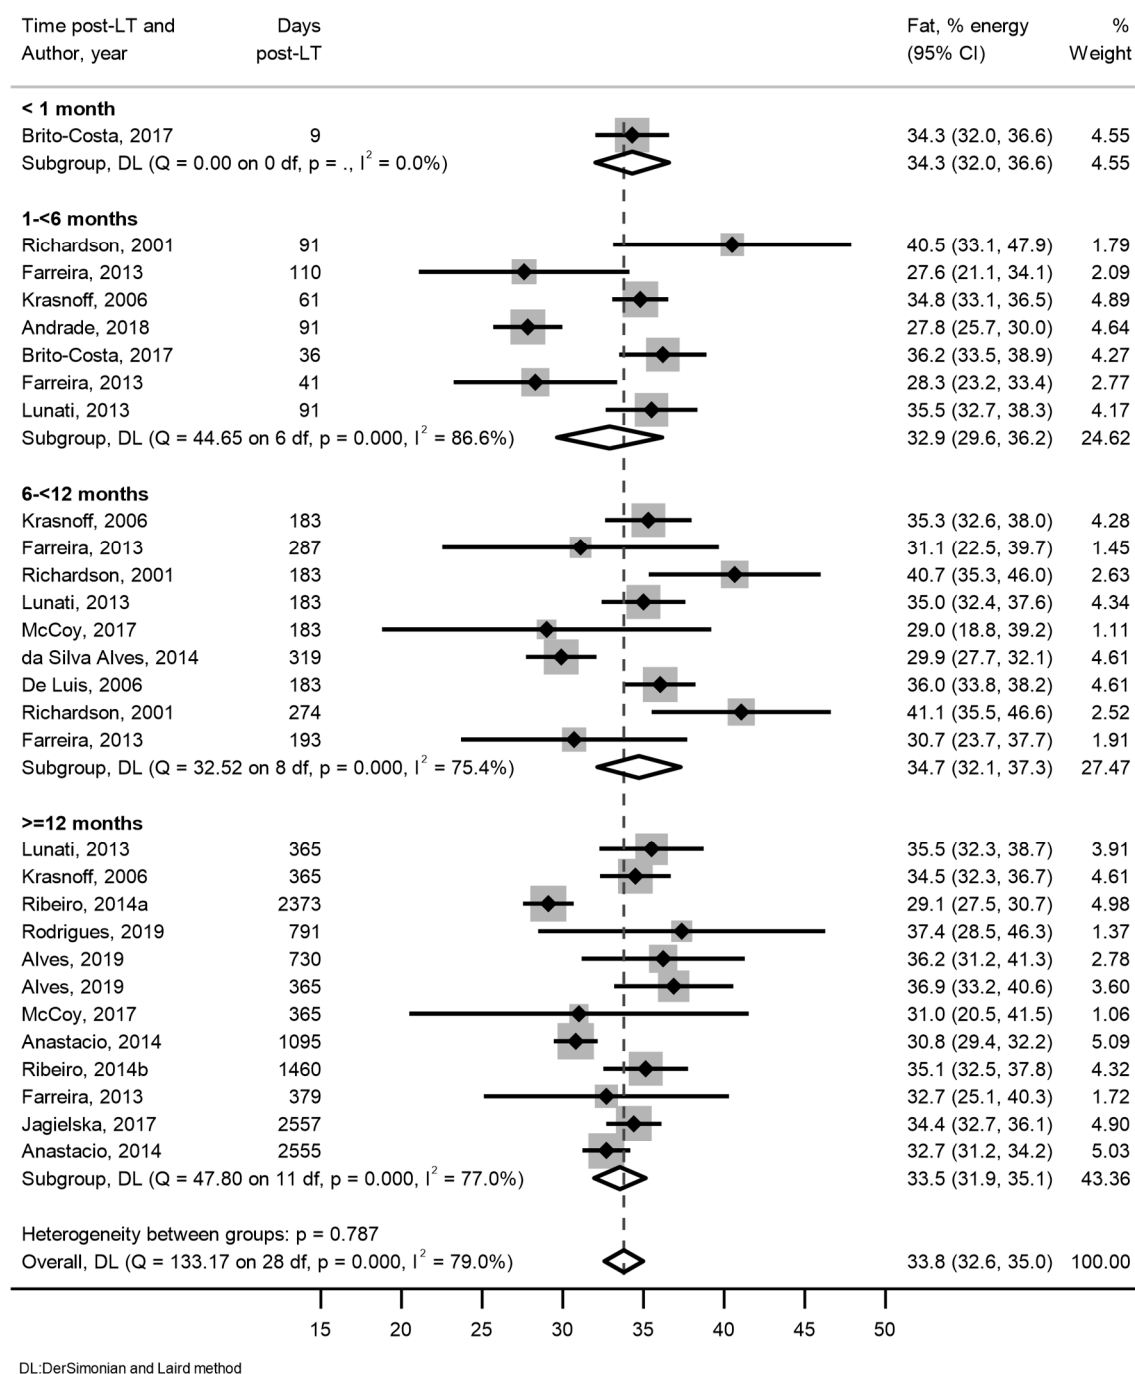

**Figure S4.** Mean daily total fat intake (percent energy) with 95% confidence intervals from included studies categorised by time post-transplant.

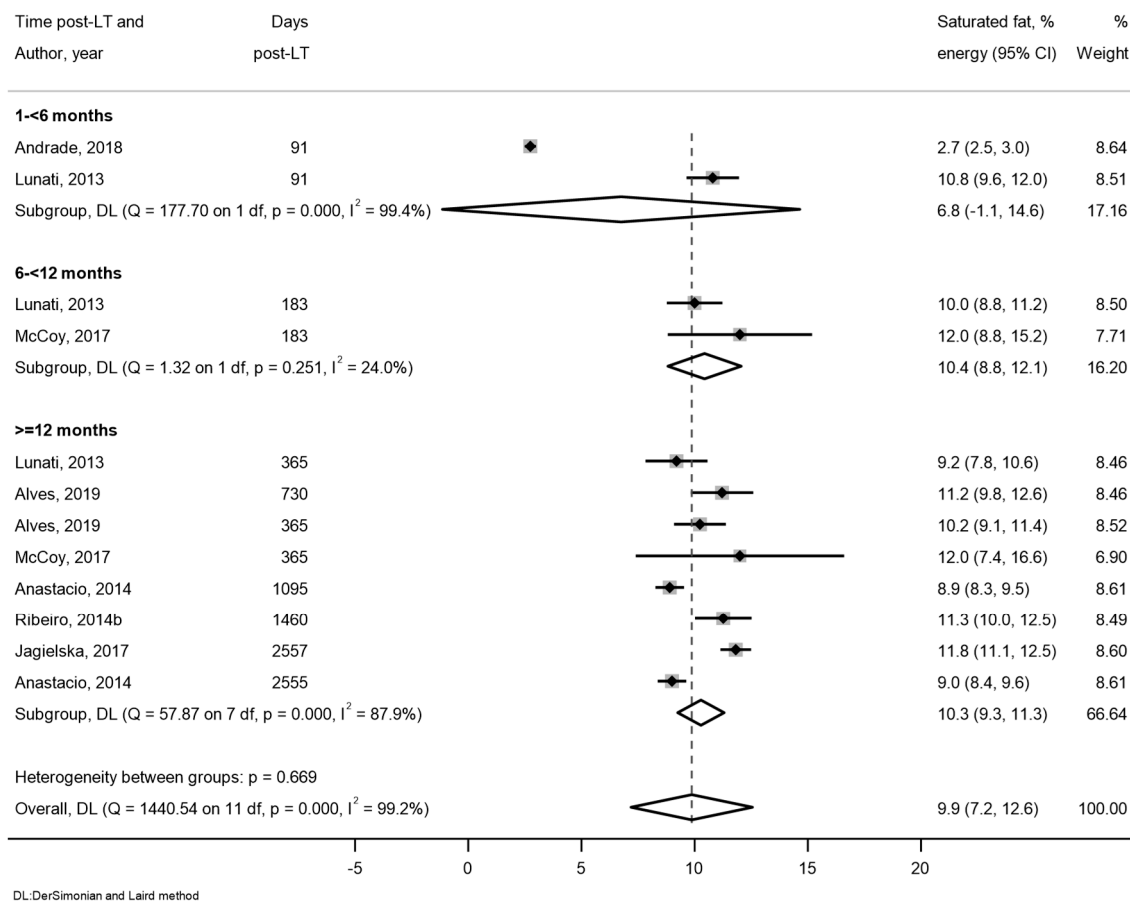

**Figure S5.** Mean daily saturated fat intake (percent energy) with 95% confidence intervals from included studies categorised by time post-transplant.

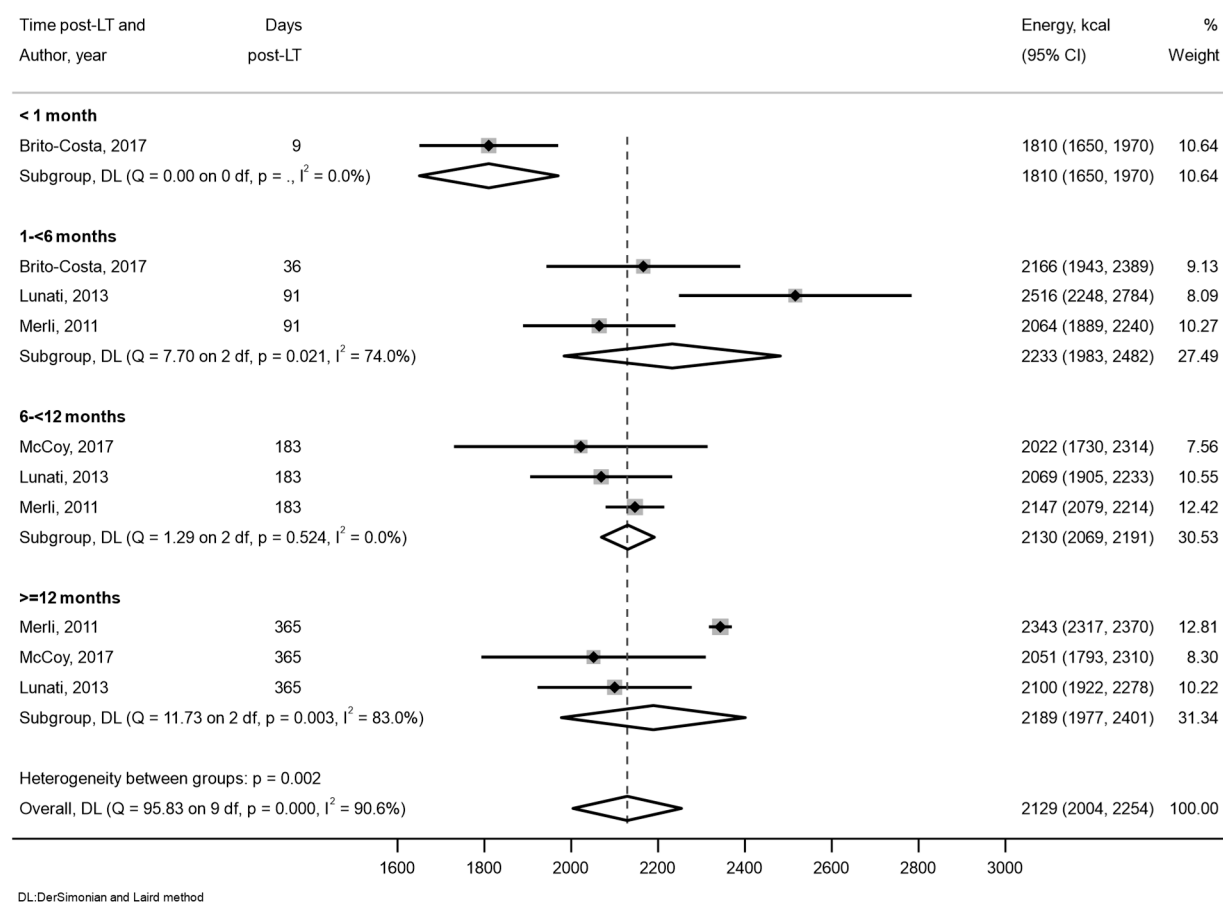

**Figure S6.** Mean daily energy intake (kcal/day) with 95% confidence intervals from included studies with low risk of bias categorised by time post-transplant.

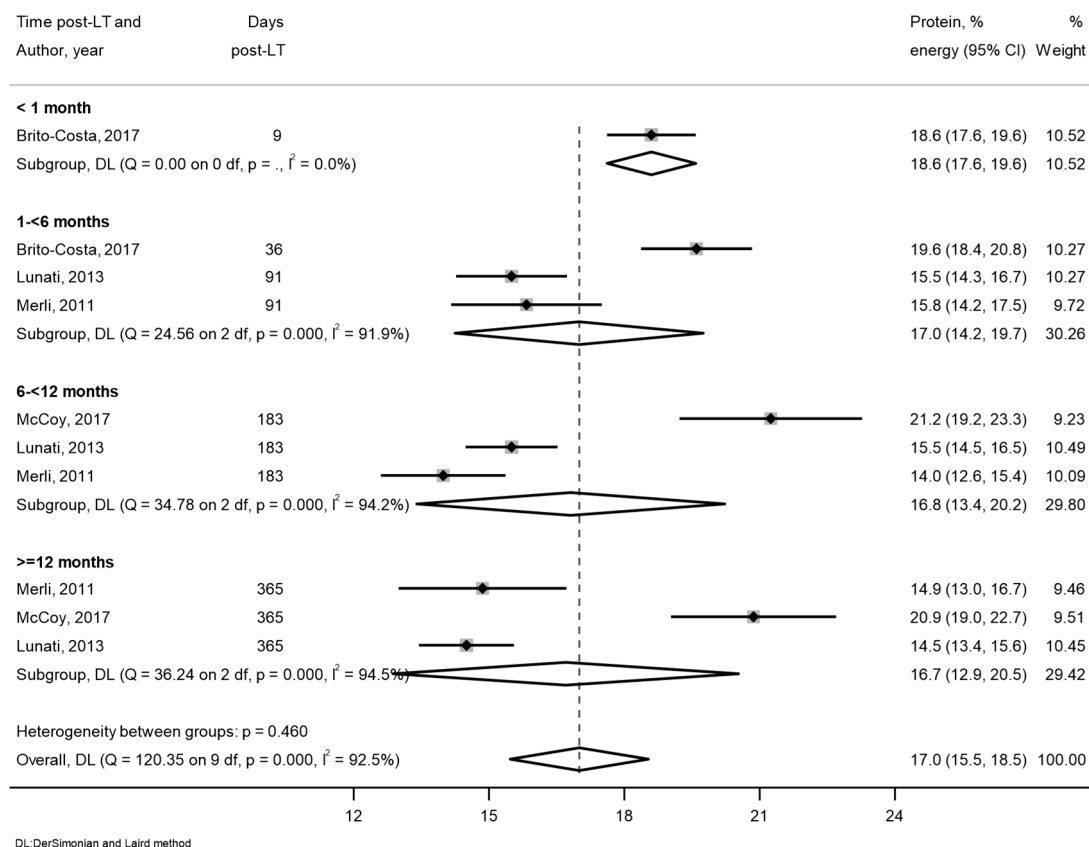

**Figure S7.** Mean daily protein intake (percent energy) with 95% confidence intervals from with low risk of bias categorised by time post-transplant.

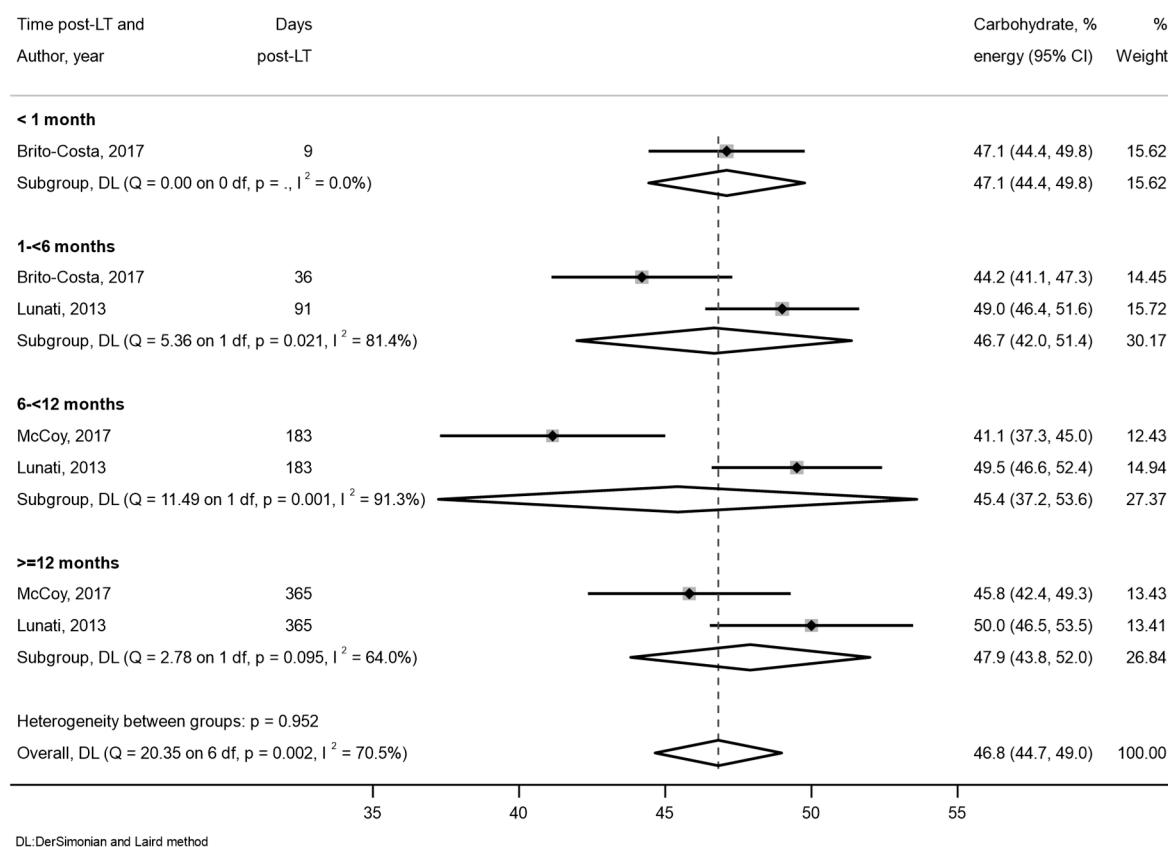

**Figure S8.** Mean daily carbohydrate intake (percent energy) with 95% confidence intervals from with low risk of bias categorised by time post-transplant.



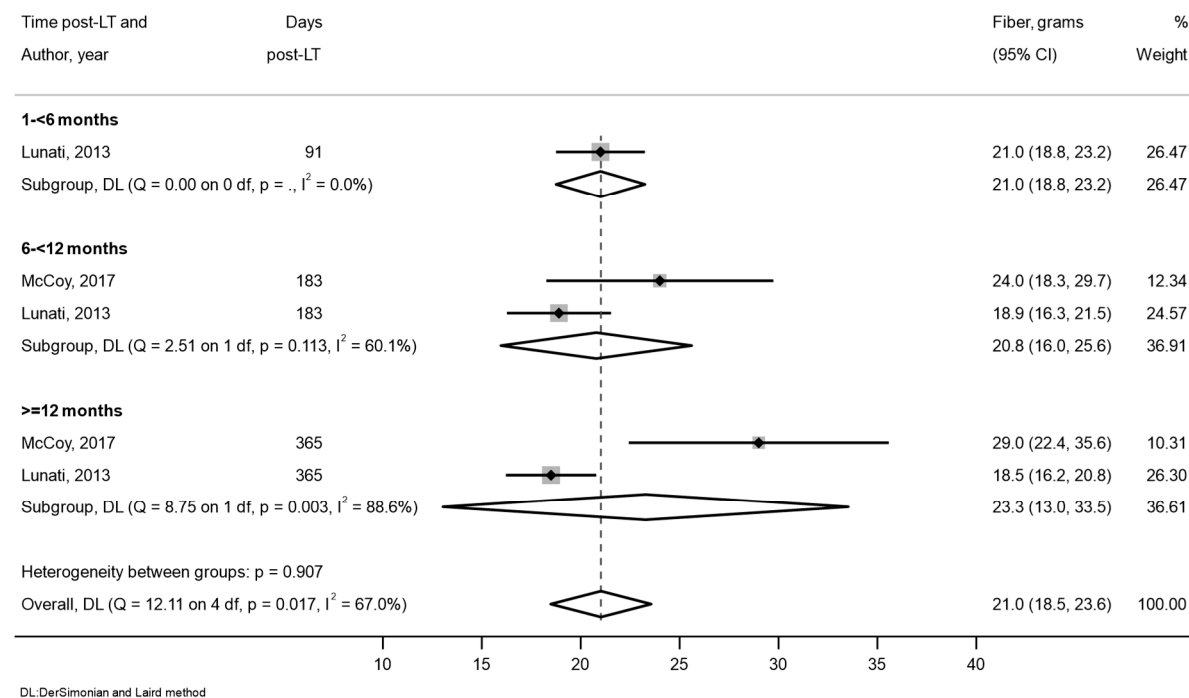

**Figure S9.** Mean daily fiber intake (grams) with 95% confidence intervals from with low risk of bias categorised by time post-transplant.

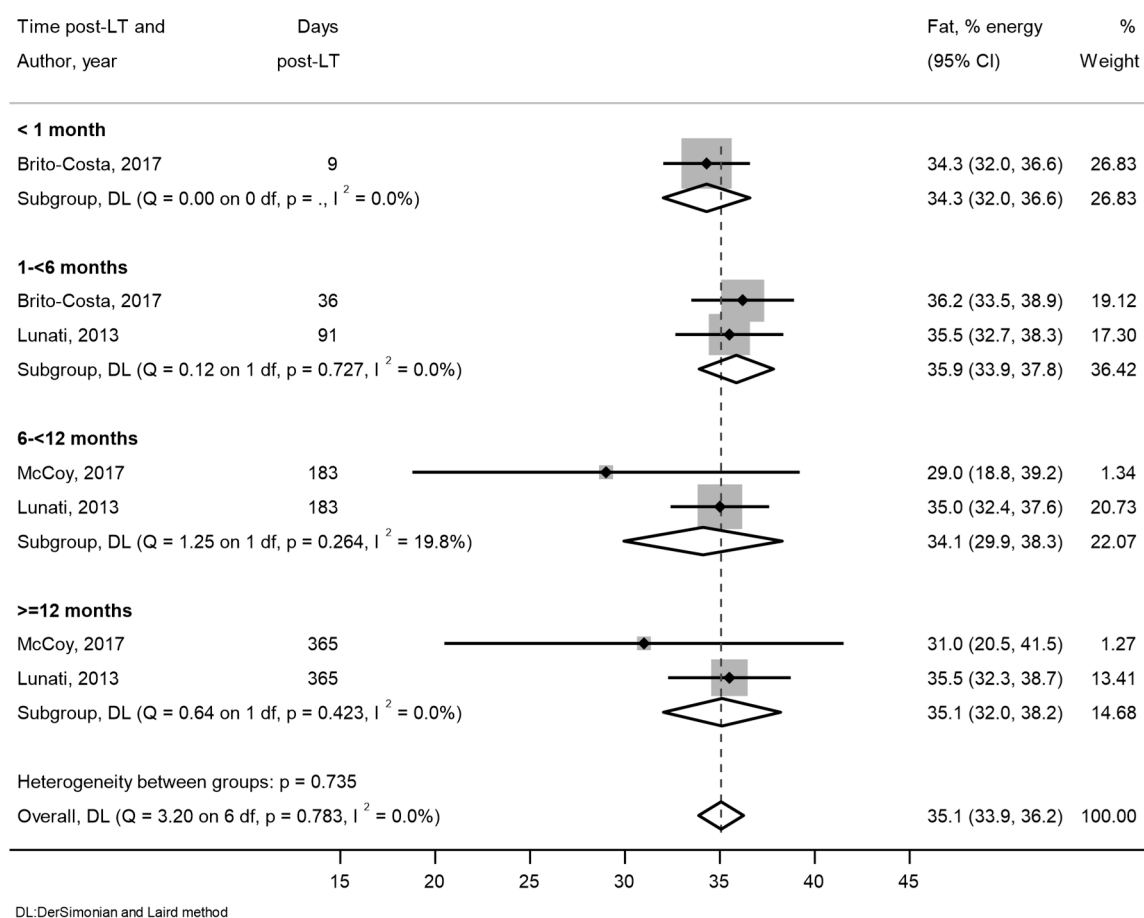

**Figure S10.** Mean daily fat intake (percent energy) with 95% confidence intervals from with low risk of bias categorised by time post-transplant.

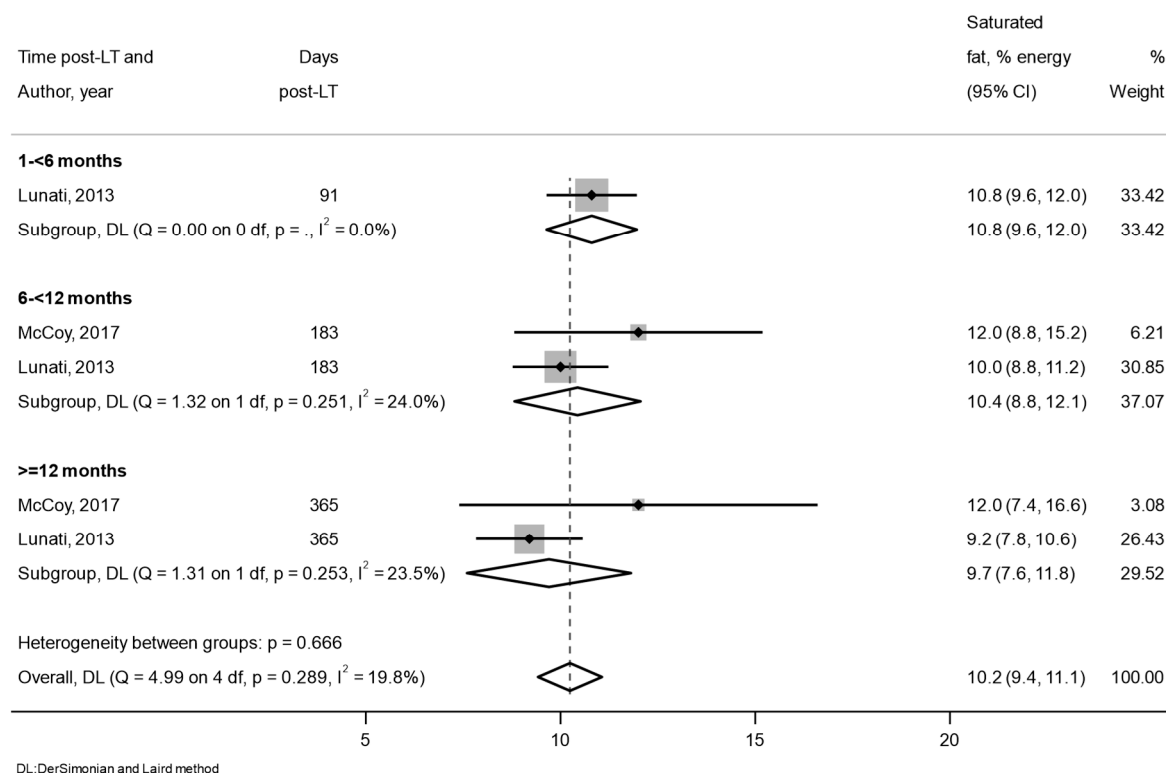

**Figure S11.** Mean daily saturated fat intake (percent energy) with 95% confidence intervals from with low risk of bias categorised by time post-transplant.

## Supplementary Tables

**Table S1.** Search terms and example of search using Embase

| Population<br>Text words                   | MESH terms             | Outcome<br>Text words | MESH terms            |
|--------------------------------------------|------------------------|-----------------------|-----------------------|
| "Liver transplant*"                        | Liver graft/           | Diet*                 | diet/                 |
| "Hepatic transplant*"                      | Liver transplantation/ | nutrition*            | nutrition/            |
| "Liver graft*"                             |                        | food                  | physical activity/    |
|                                            |                        | beverage*             | exercise/             |
|                                            |                        | drink*                | lifestyle/            |
|                                            |                        | intake                | qualitative research/ |
|                                            |                        | feeding               | interview/            |
|                                            |                        | eat*                  |                       |
|                                            |                        | meal*                 |                       |
|                                            |                        | lifestyle*            |                       |
|                                            |                        | exercis*              |                       |
|                                            |                        | "physical activit*"   |                       |
|                                            |                        | mobil*                |                       |
|                                            |                        | ambulat*              |                       |
|                                            |                        | "physical exertion"   |                       |
|                                            |                        | sport*                |                       |
|                                            |                        | "bodily movement"     |                       |
|                                            |                        | "motor activit*"      |                       |
|                                            |                        | "physical effort"     |                       |
|                                            |                        | "Lived experience*"   |                       |
|                                            |                        | Qualitative           |                       |
| Example of search using Embase             |                        |                       |                       |
| 1. "liver transplant*".ti,ab.              |                        |                       |                       |
| 2. "hepatic transplant*".ti,ab.            |                        |                       |                       |
| 3. "liver graft*".ti,ab.                   |                        |                       |                       |
| 4. exp liver graft/ (Subject heading term) |                        |                       |                       |
| 5. 1 or 2 or 3 or 4                        |                        |                       |                       |
| 6. Diet*.ti,ab.                            |                        |                       |                       |
| 7. nutrition*.ti,ab.                       |                        |                       |                       |
| 8. food.ti,ab.                             |                        |                       |                       |
| 9. beverage*.ti,ab.                        |                        |                       |                       |
| 10. drink*.ti,ab.                          |                        |                       |                       |
| 11. intake.ti,ab.                          |                        |                       |                       |
| 12. feed*.ti,ab.                           |                        |                       |                       |
| 13. eat*.ti,ab.                            |                        |                       |                       |
| 14. meal*.ti,ab.                           |                        |                       |                       |
| 15. lifestyle*.ti,ab.                      |                        |                       |                       |
| 16. exercis*.ti,ab.                        |                        |                       |                       |
| 17. "physical activit*".ti,ab.             |                        |                       |                       |
| 18. mobil*.ti,ab.                          |                        |                       |                       |
| 19. ambulat*.ti,ab.                        |                        |                       |                       |
| 20. "physical exertion".ti,ab.             |                        |                       |                       |
| 21. "bodily movement".ti,ab.               |                        |                       |                       |
| 22. "motor activit*".ti,ab.                |                        |                       |                       |
| 23. "physical effort".ti,ab.               |                        |                       |                       |
| 24. "lived experience".ti,ab.              |                        |                       |                       |
| 25. qualitative.ti,ab.                     |                        |                       |                       |
| 26. exp diet/                              |                        |                       |                       |
| 27. exp nutrition/                         |                        |                       |                       |
| 28. exp physical activity/                 |                        |                       |                       |

- 29. exp exercise/
  - 30. exp lifestyle/
  - 31. exp qualitative research/
  - 32. exp interview/
  - 33. sport\*.ti,ab.
  - 34. 6 or 7 or 8 or 9 or 10 or 11 or 12 or 13 or 14 or 15 or 16 or 17 or 18 or 19 or 20 or 21 or 22 or 23 or  
24 or 25 or 26 or 27 or 28 or 29 or 30 or 31 or 32 or 33
  - 35. 5 and 34
-

**Table S2.** Findings from four studies reporting food groups\*

| Author, year                                                                                                           | Bakshi and Singh.,<br>2018 | McCoy et al., 2017 |               | Ribeiro et al.,<br>2014 | Anastacio et al.,<br>2013                      |
|------------------------------------------------------------------------------------------------------------------------|----------------------------|--------------------|---------------|-------------------------|------------------------------------------------|
|                                                                                                                        | Mean (SD)                  | Median (IQR)       |               | Median (range)          | Median (IQR)                                   |
| Time post-transplant                                                                                                   | 12 days                    | 6 months           | 12 months     | Mean (SD): 4 (3) years  | Median (range); 4 years (13 months – 14 years) |
| Cereals, bread, etc. (g)/ Cereal grains and products (g)/ Cereals and cereal products (g)/ Breads, cereals, tubers (g) | 182.2 (80.9)               | 154 (84-200)       | 200 (150-285) | 390 (89-1680)           | 379 (255-550)                                  |
| Cereal-based products and dishes (g)                                                                                   |                            | 68 (42-136)        | 122 (55-195)  |                         |                                                |
| Wholegrain cereals (g)                                                                                                 |                            |                    |               | 0 (0-190)               |                                                |
| Vegetables (g)/ Other vegetables (g)                                                                                   | 88.4 (101.6)               | 199 (89-319)       | 234 (134-344) | 140 (0-600)             | 104 (65-200)                                   |
| Leafy vegetables (g)/ Greenery (g)                                                                                     | 1.1 (8.2)                  |                    |               | 110 (0-521)             |                                                |
| Roots and tubers (g)                                                                                                   | 4.8 (15.8)                 |                    |               |                         |                                                |
| Fruit (g)                                                                                                              | 10.8 (42.5)                | 185 (58-303)       | 184 (49-333)  | 123 (0-717)             | 123 (45-248)                                   |
| Milk (mL)                                                                                                              |                            |                    |               | 150 (0-720)             | 125 (0-200)                                    |
| Cheese (g)                                                                                                             |                            |                    |               | 0 (0-15)                | 10 (0-15)                                      |
| Yogurt (g)/ (ml)                                                                                                       |                            |                    |               | 0 (0-150)               | 0 (0-0)                                        |
| Milk and milk products (g/ml)/ Dairy products and dishes (g)                                                           | 605.4 (224.4)              | 264 (153-642)      | 418 (213-721) | 150 (0-720)             |                                                |
| Egg products and dishes (g)                                                                                            |                            | 0 (0-31)           | 0 (0-11)      |                         |                                                |
| Beans (g)/ Pulses and legumes (g)                                                                                      | 48.3 (63.4)                |                    |               |                         | 120 (60-200)                                   |
| Meat, poultry, etc. (g)                                                                                                | 168.3 (177.6)              | 154 (96-197)       | 128 (107-196) | 127 (0-500)             | 120 (91-185)                                   |
| Fish and seafood products and dishes (g)                                                                               |                            | 21 (0-29)          | 21 (2-48)     |                         |                                                |
| Sweet beverages (mL) <sup>28</sup> / Sugar sweetened beverages (g)                                                     |                            |                    |               | 200 (0-2000)            | 154 (0-385)                                    |
| Sugar and sweets (g)                                                                                                   | 6 (4.6)                    |                    |               | 0 (0-500)               | 20 (0-30)                                      |
| Fat and oil (g)                                                                                                        | 9.3 (10.9)                 | 10 (1-17)          | 10 (5-19)     |                         | 19 (8-28)                                      |

\*Studies reported in order of time post-transplant. IQR: interquartile range; SD: standard deviation.

**Table S3:** Findings from nine studies comparing nutritional intake at two or more time points after liver transplant, with different anti-rejection drugs and between sexes.

| Correlate                                                     | Author                                                | Measure        | Statistical analysis method reported                                                                                  | Energy                                                                                                                    | Protein                                                                                                                           | Carbohydrate                                                                                                                                                                                       | Fiber                                                                                                             | Fat                                                                                                                    | Sat fat                                                                                                        |
|---------------------------------------------------------------|-------------------------------------------------------|----------------|-----------------------------------------------------------------------------------------------------------------------|---------------------------------------------------------------------------------------------------------------------------|-----------------------------------------------------------------------------------------------------------------------------------|----------------------------------------------------------------------------------------------------------------------------------------------------------------------------------------------------|-------------------------------------------------------------------------------------------------------------------|------------------------------------------------------------------------------------------------------------------------|----------------------------------------------------------------------------------------------------------------|
| Time: 2.4 days vs. 8.1 days                                   | Ribeiro et al., 2020                                  | Median [IQR]   | Kruskal-Wallis test and Dunn post test*                                                                               | ↑594.9 [398.9-989.7] vs 1251.8 [1029.2-1779.1] kcal, p<0.05                                                               | ↑27.1 [13.3-47.7] vs. 63.4 [46.3-93.8] grams, p<0.05<br><br>18.6 [14.3–19.9] vs. 18.4 (15.6–23.9) percent energy, p>0.05          |                                                                                                                                                                                                    |                                                                                                                   |                                                                                                                        |                                                                                                                |
| Time: Day 9 vs. Day 12                                        | Bakshi et al., 2018                                   | Mean±SD        | ANOVA followed by post hoc test                                                                                       | ↑Post-hoc: 1285 ± 594, vs. 1485 ± 732 kcal, p=0.019                                                                       | ↑Post-hoc: 63.5 ± 31.7, vs. 73.6 ± 36.1 grams, p=0.014                                                                            |                                                                                                                                                                                                    |                                                                                                                   |                                                                                                                        |                                                                                                                |
| Time: Day 9 vs. Day 35                                        | Brito costa et al., 2016 and Brito costa et al., 2017 | Mean±SD        | Friedman test, multiple comparisons                                                                                   | ↑1810.0±455.1 vs. 2166±635.4 kcal, p<0.05                                                                                 | 18.6±2.8 vs. 19.6±3.5 percent energy, p>0.05.                                                                                     | ↓47.1±7.6 vs. 44.2±8.8 percent energy, p<0.05                                                                                                                                                      |                                                                                                                   | 34.3±6.5 vs. 36.2±7.7 percent energy, p>0.05                                                                           |                                                                                                                |
| Time: 41 days<br>110 days<br>182 days<br>287 days<br>379 days | Farreira et al., 2013                                 | Mean±SD        | Repeated-measures analyses of variance asphericity correction, followed by paired t tests with Bonferroni correction* | No statistically significant differences reported**                                                                       | No statistically significant differences reported**                                                                               | Post-hoc: ↓55.4 ± 6.0 percent energy at 110 days vs. 51.7 ± 9.7 percent energy at 287 days, p<0.01<br><br>↓55.4 ± 6.0 percent energy at 110 days vs. 48.9 ± 7.9 percent energy at 379 days, p<0.01 |                                                                                                                   | No statistically significant differences reported**                                                                    |                                                                                                                |
| Time: 6 and 12 months                                         | McCoy et al., 2017                                    | Mean±SD        | ANOVA followed by post-hoc Tukey's test*                                                                              | 9.444±2.535 at pre-transplant, 8.460±1.917 at 6 months post-transplant, and 8.583±1.645 kilojoules at 12 months, p=0.415. | 1.7±0.5 at pre-transplant, 1.6±0.4 at 6 months post-transplant, and 1.6±0.5 grams/kilogram at 12 months post-transplant, p=0.590. | Post-hoc: ↑208±49 grams at 6 months post-transplant vs.235±36 at 12 months post-transplant, p<0.05                                                                                                 | 26±11 at pre-transplant, 24±9 at 6 months post-transplant, and 29±10 grams at 12 months post-transplant, p=0.745. | 31±9 at pre-transplant, 29±16 at 6 months post-transplant, 31±16 percent energy at 12 months post-transplant, p=0.511. | 32±15 at pre-transplant, 23±23 at 6 months post-transplant, 27±28 grams at 12 months post-transplant, p=0.558. |
| Time: 3, 6 and 12 months                                      | Merli et al., 2011                                    | Median (range) | ANOVA followed by                                                                                                     | 29 (23-41) at pre-transplant, 31 (24-41) at 3 months post-                                                                | 0.9 (0.6-4.4) at-pre-transplant, 1.2 (0.7-1.9) at 3                                                                               |                                                                                                                                                                                                    |                                                                                                                   |                                                                                                                        |                                                                                                                |

*Spillman et al. Nutritional intake after liver transplant: systematic review and meta-analysis.*  
*Supporting information*

|                                                |                          |            |                                                                                     |                                                                                                                          |                                                                                                                                 |                                                                                         |                                                                                            |                                                                                         |                                                                    |
|------------------------------------------------|--------------------------|------------|-------------------------------------------------------------------------------------|--------------------------------------------------------------------------------------------------------------------------|---------------------------------------------------------------------------------------------------------------------------------|-----------------------------------------------------------------------------------------|--------------------------------------------------------------------------------------------|-----------------------------------------------------------------------------------------|--------------------------------------------------------------------|
|                                                |                          |            | Bonferroni test*                                                                    | transplant, 32 (29-37) at 6 months post-transplant, and 33 (27-36) kcal/kilogram at 12 months post-transplant, p=0.0006. | months post-transplant, 1.1 (0.7-1.5) at 6 months post-transplant, and 1.2 (0.7-1.6) g/Kg at 12 months post-transplant, p=0.01. |                                                                                         |                                                                                            |                                                                                         |                                                                    |
|                                                |                          |            |                                                                                     | No statistically significant differences reported between post-transplant time points**                                  | No statistically significant differences reported between post-transplant time points**                                         |                                                                                         |                                                                                            |                                                                                         |                                                                    |
| Time: 3, 6 and 9 months                        | Richardson et al., 2001  | Mean±SEM   | Repeated-measures analysis of variance and for pairwise comparisons paired t tests* | No statistically significant differences between post-transplant time-points reported**                                  | No statistically significant differences between post-transplant time-points reported**                                         | No statistically significant differences between post-transplant time-points reported** |                                                                                            | No statistically significant differences between post-transplant time-points reported** |                                                                    |
| Time: 3 years vs. 7 years                      | Anastacio et al., 2014   | Mean±SD    | Paired t-test                                                                       | ↑1920.9±633.1 vs. 2016.7±666.1 kcal, p<0.01.                                                                             | ↓14.8±4.4 vs. 14.5±3.5 percent energy, p<0.01.                                                                                  | 53.3±6.9 vs. 51.3±7.0 percent energy, p=0.46.                                           | ↑16.4±7.2 vs. 17.5±7.2 grams, p<0.01.                                                      | 30.8±5.6 vs. 32.7±6.1 percent energy, p=0.9.                                            | 8.9 ± 2.6 vs. 9.0 ± 2.6 percent energy, p=0.47.                    |
| Immunosuppression: Cyclosporine vs. Tacrolimus | Brito costa et al., 2016 | Mean±SD    | Not reported                                                                        | 2083.8±637.9 vs. 2049.3±895.1kcal, p=0.756                                                                               | 17.8±5.1 vs. 18.8±5.6 percent energy, p=0.465                                                                                   | 50.4±9.5 vs. 50.3±10 percent energy, p=0.808                                            |                                                                                            | 31.8±9.2 vs.30.9±7.2 percent energy, p=0.834                                            |                                                                    |
| Sex: Female vs. Male                           | Jagielska et al., 2017   | Proportion | Not reported                                                                        | 100.0% vs. 93.6% consuming <estimated requirements, p=0.3675                                                             | 25% vs. 6.5% consuming <15% energy from protein, p=0.0887                                                                       | 25% vs. 74.2% consuming <50% energy from carbohydrate, p=0.0031                         | 8.3% vs. 9.7% consuming >25g fiber, p=0.8917<br>0% vs. 6.5% consuming >30g fiber, p=0.3675 | 41.7% vs. 9.7% consuming <30% energy from fat, p=0.0156                                 | 41.7% vs. 16.1% consuming <10% energy from saturated fat, p=0.0002 |

Significant findings in gray; \* including pre- and post-transplant measures; \*\* no p values or confidence intervals reported; ↑ Intake significantly increased as time progressed post-transplant; ↓ Intake significantly decreased as time progressed post-transplant; blank cells show variable not investigated. IQR: interquartile range; SD: standard deviation.



**Table S4.** Meta-regression sensitivity analysis including studies with low risk of bias to investigate differences in nutrient intake for study level variables\* (n=10).

|                                                         | Coefficient | 95% CI |       | p      | I <sup>2</sup> |
|---------------------------------------------------------|-------------|--------|-------|--------|----------------|
| <b>Average age</b>                                      |             |        |       |        |                |
| Energy (kcal)                                           | 102.5       | -141.6 | 346.6 | 0.361  | 85.63          |
| Protein (% energy)                                      | -2.5        | -6.0   | 0.9   | 0.129  | 91.44          |
| <b>Sex</b>                                              |             |        |       |        |                |
| Energy (kcal)                                           | -19.7       | -44.4  | 5.0   | 0.102  | 87.13          |
| Protein (% energy)                                      | 0.4         | 0.2    | 0.7   | 0.004  | 76.17          |
| <b>Year of publication</b>                              |             |        |       |        |                |
| Energy (kcal)                                           | -35.1       | -83.0  | 12.7  | 0.129  | 84.69          |
| Protein (% energy)                                      | 0.9         | 0.6    | 1.2   | <0.001 | 59.83          |
| <b>Continent – Europe vs. other</b>                     |             |        |       |        |                |
| Energy (kcal)                                           | 108.6       | -279.3 | 496.4 | 0.537  | 91.04          |
| Protein (% energy)                                      | -5.0        | -8.7   | -1.3  | 0.014  | 89.65          |
| <b>Dietary assessment method – food diary vs. other</b> |             |        |       |        |                |
| Energy (kcal)                                           | 68.2        | -106.9 | 243.4 | 0.395  | 86.41          |
| Protein (% energy)                                      | -0.5        | -3.1   | 2.2   | 0.696  | 92.32          |

\* Meta-regression was not performed for different time periods post-transplant or etiology of liver disease due to the limited number of observations for categories (n studies in total <10).

**Table S5.** Meta-regression sensitivity analysis comparing converted with non-converted data\*

| Variable                 | No. observations | Coefficient | 95% CI |       | p     | I <sup>2</sup> |
|--------------------------|------------------|-------------|--------|-------|-------|----------------|
| Energy (kcal)            | 35               | -18.8       | -241.1 | 203.5 | 0.864 | 88.95          |
| Protein (% energy)       | 33               | 0.3         | -1.4   | 2.1   | 0.692 | 88.60          |
| Carbohydrate (% energy)  | 29               | -1.3        | -4.3   | 1.6   | 0.365 | 78.87          |
| Fat (% energy)           | 29               | 3.4         | 0.6    | 6.2   | 0.018 | 77.76          |
| Saturated fat (% energy) | 12               | -0.7        | -4.3   | 2.9   | 0.679 | 98.96          |
| Fiber (grams)            | 14               | 3.9         | -0.2   | 8.1   | 0.058 | 95.74          |

\* Conversion means, for example, a statistical conversion from medians + interquartile range to means + standard deviation.
